# Supplementary material for: Comparative transcriptome analysis of the interaction between Actinidia chinensis var. chinensis and Pseudomonas syringae pv. actinidiae in absence and presence of acibenzolar-S-methyl
Source: BMC Genomics. 2018 Aug 6;19:585. doi: 10.1186/s12864-018-4967-4 (PMC6090863; doi:10.1186/s12864-018-4967-4)
Supplement: Supplementary file 9 — Table S6. List of subset of differentially expressed genes (DEGs) related to ROS detoxification. (XLSX 470 kb) [file 12864_2018_4967_MOESM9_ESM.xlsx]

## Sheet: ROS
Additional file 9: Table S6. List of DEGs related to ROS detoxification
Transcripts ID	Predicted Function (Blastx_vs_nr)	gene ID swissprot/nr	Log2FC for each library contrast
			HC_vs_I3	HC_vs_I24	HC_vs_I48	I3_vs_ASM-I3	I24_vs_ASM-I24	I48_vs_ ASM-I48	HC_vs_ASM	abreviation	A. chinensis HongYang ortholog	KEGG_orthologs	description
Ach_contig26749	L-ascorbate oxidase [Sesamum indicum]	gi|114270|sp|P14133.1|ASO_CUCSA	2.44774	0	-1.44631	0	0	2.63498	0	ASO			(at4g39830 : 856.0) Cupredoxin superfamily protein; FUNCTIONS IN: oxidoreductase activity, L ascorbate oxidase activity, copper ion binding; INVOLVED IN: oxidation reduction; LOCATED IN: endomembrane system, extracellular region; EXPRESSED IN: 19 plant structures; EXPRESSED DURING: 12 growth stages; CONTAINS InterPro DOMAIN/s: Multicopper oxidase, type 3 (InterPro:IPR011707), Multicopper oxidase,…
Ach_contig25558	catalase [Gossypium hirsutum]	gi|1345674|sp|P17598.2|CATA1_GOSHI	0	0	0	0	0	2.16845	0	CATA1			(p17598|cata1_goshi : 442.0) Catalase isozyme 1 (EC 1.11.1.6) Gossypium hirsutum (Upland cotton) & (at4g35090 : 425.0) Encodes a peroxisomal catalase, highly expressed in bolts and leaves. mRNA expression patterns show circadian regulation with mRNA levels being high in the subjective early morning. Loss of function mutations have increased H2O2 levels and increased H2O2 sensitivity. Mutants accu…
Ach_contig25559	catalase [Camellia sinensis]	gi|1345684|sp|P49317.1|CATA3_NICPL	-1.6606	0	0	0	0	0	0	CATA3			(p49317|cata3_nicpl : 323.0) Catalase isozyme 3 (EC 1.11.1.6) Nicotiana plumbaginifolia (Leadwort leaved tobacco) & (at4g35090 : 306.0) Encodes a peroxisomal catalase, highly expressed in bolts and leaves. mRNA expression patterns show circadian regulation with mRNA levels being high in the subjective early morning. Loss of function mutations have increased H2O2 levels and increased H2O2 sensitiv…
Ach_contig19106	ascorbate peroxidase [Camellia sinensis]	gi|1351963|sp|P48534.2|APX1_PEA	-1.53047	0	0	0	0	0	0	APX1			(p48534|apx1_pea : 327.0) L ascorbate peroxidase, cytosolic (EC 1.11.1.11) (AP) (PsAPx01) Pisum sativum (Garden pea) & (at1g07890 : 318.0) Encodes a cytosolic ascorbate peroxidase APX1. Ascorbate peroxidases are enzymes that scavenge hydrogen peroxide in plant cells. Eight types of APX have been described for Arabidopsis: three cytosolic (APX1, APX2, APX6), two chloroplastic types (stromal sAPX, …
Ach_contig28940	StRBOHC| NADPH oxidase [Solanum tuberosum]	gi|166199749|sp|Q2HXL0.2|RBOHC_SOLTU	3.38886	0	0	0	0	0	0	RBOHC			(at5g47910 : 205.0) NADPH/respiratory burst oxidase protein D (RbohD).Interacts with AtrbohF gene to fine tune the spatial control of ROI production and hypersensitive response to cell in and around infection site.; respiratory burst oxidase homologue D (RBOHD); FUNCTIONS IN: NAD(P)H oxidase activity; INVOLVED IN: oxygen and reactive oxygen species metabolic process, defense response to fungus, r…
Ach_contig28930	RecName: Full=Respiratory burst oxidase homolog protein C; AltName: Full=NADPH oxidase RBOHC; AltName: Full=StRBOHC >gi|146219363|dbj|BAE79344.2| NADPH oxidase [Solanum tuberosum]	gi|166199749|sp|Q2HXL0.2|RBOHC_SOLTU	4.23689	0	0	0	0	0	0	RBOHC			(at5g47910 : 205.0) NADPH/respiratory burst oxidase protein D (RbohD).Interacts with AtrbohF gene to fine tune the spatial control of ROI production and hypersensitive response to cell in and around infection site.; respiratory burst oxidase homologue D (RBOHD); FUNCTIONS IN: NAD(P)H oxidase activity; INVOLVED IN: oxygen and reactive oxygen species metabolic process, defense response to fungus, r…
Ach_contig28941	StRBOHC| NADPH oxidase [Solanum tuberosum]	gi|166199749|sp|Q2HXL0.2|RBOHC_SOLTU	3.4623	0	0	0	0	0	0	RBOHC			(at5g47910 : 226.0) NADPH/respiratory burst oxidase protein D (RbohD).Interacts with AtrbohF gene to fine tune the spatial control of ROI production and hypersensitive response to cell in and around infection site.; respiratory burst oxidase homologue D (RBOHD); FUNCTIONS IN: NAD(P)H oxidase activity; INVOLVED IN: oxygen and reactive oxygen species metabolic process, defense response to fungus, r…
Ach_contig28939	StRBOHC| NADPH oxidase [Solanum tuberosum]	gi|166199749|sp|Q2HXL0.2|RBOHC_SOLTU	2.73581	0	0	0	0	0	0	RBOHC			(at5g47910 : 226.0) NADPH/respiratory burst oxidase protein D (RbohD).Interacts with AtrbohF gene to fine tune the spatial control of ROI production and hypersensitive response to cell in and around infection site.; respiratory burst oxidase homologue D (RBOHD); FUNCTIONS IN: NAD(P)H oxidase activity; INVOLVED IN: oxygen and reactive oxygen species metabolic process, defense response to fungus, r…
Ach_contig25556	catalase [Soldanella alpina]	gi|17865454|sp|O24339.1|CATA_SOLAP	-1.97876	0	0	0	0	0	0	CATA			(p49317|cata3_nicpl : 180.0) Catalase isozyme 3 (EC 1.11.1.6) Nicotiana plumbaginifolia (Leadwort leaved tobacco) & (at4g35090 : 162.0) Encodes a peroxisomal catalase, highly expressed in bolts and leaves. mRNA expression patterns show circadian regulation with mRNA levels being high in the subjective early morning. Loss of function mutations have increased H2O2 levels and increased H2O2 sensitiv…
Ach_contig25561	catalase [Vigna mungo]	gi|17865454|sp|O24339.1|CATA_SOLAP	-1.70502	0	0	0	0	0	0	CATA			(o48561|cata4_soybn : 149.0) Catalase 4 (EC 1.11.1.6) Glycine max (Soybean) & (at4g35090 : 147.0) Encodes a peroxisomal catalase, highly expressed in bolts and leaves. mRNA expression patterns show circadian regulation with mRNA levels being high in the subjective early morning. Loss of function mutations have increased H2O2 levels and increased H2O2 sensitivity. Mutants accumulate more toxic ion…
Ach_contig13293	peroxidase precursor [Quercus suber]	gi|223635590|sp|A7NY33.1|PER4_VITVI	0	0	0	0	1.67649	0	1.72546	PER4			(at5g58400 : 269.0) Peroxidase superfamily protein; FUNCTIONS IN: peroxidase activity, heme binding; INVOLVED IN: oxidation reduction, response to oxidative stress; LOCATED IN: endomembrane system; EXPRESSED IN: 6 plant structures; EXPRESSED DURING: 4 anthesis, C globular stage, petal differentiation and expansion stage; CONTAINS InterPro DOMAIN/s: Haem peroxidase (InterPro:IPR010255), Plant pero…
Ach_contig13292	hypothetical protein PRUPE_ppa008607mg [Prunus persica]	gi|223635590|sp|A7NY33.1|PER4_VITVI	0	0	0	0	2.04894	1.85157	2.01085	PER4			(p22195|per1_arahy : 178.0) Cationic peroxidase 1 precursor (EC 1.11.1.7) (PNPC1) Arachis hypogaea (Peanut) & (at5g05340 : 176.0) Peroxidase superfamily protein; FUNCTIONS IN: protein binding, peroxidase activity; INVOLVED IN: response to oxidative stress, oxidation reduction; LOCATED IN: apoplast, cell wall; EXPRESSED IN: 9 plant structures; EXPRESSED DURING: LP.04 four leaves visible, 4 anthesi…
Ach_contig14667	peroxidase 4 [Vitis vinifera]	gi|223635590|sp|A7NY33.1|PER4_VITVI	-1.28343	0	0	1.63263	2.50716	2.1818	2.0772	PER4	Achn230561		(at5g05340 : 426.0) Peroxidase superfamily protein; FUNCTIONS IN: protein binding, peroxidase activity; INVOLVED IN: response to oxidative stress, oxidation reduction; LOCATED IN: apoplast, cell wall; EXPRESSED IN: 9 plant structures; EXPRESSED DURING: LP.04 four leaves visible, 4 anthesis, C globular stage, petal differentiation and expansion stage; CONTAINS InterPro DOMAIN/s: Haem peroxidase (I…
Ach_contig14668	peroxidase 4 [Vitis vinifera]	gi|223635590|sp|A7NY33.1|PER4_VITVI	0	0	0	1.7418	2.65941	2.42168	2.40055	PER4	Achn094961	K03781	(at5g05340 : 428.0) Peroxidase superfamily protein; FUNCTIONS IN: protein binding, peroxidase activity; INVOLVED IN: response to oxidative stress, oxidation reduction; LOCATED IN: apoplast, cell wall; EXPRESSED IN: 9 plant structures; EXPRESSED DURING: LP.04 four leaves visible, 4 anthesis, C globular stage, petal differentiation and expansion stage; CONTAINS InterPro DOMAIN/s: Haem peroxidase (I…
Ach_contig25560	catalase [Prunus avium]	gi|231688|sp|P30567.1|CATA2_GOSHI	-1.6629	0	0	0	0	0	0	CATA2	Achn260011	K03781	(p30567|cata2_goshi : 51.6) Catalase isozyme 2 (EC 1.11.1.6) Gossypium hirsutum (Upland cotton) & (at4g35090 : 50.8) Encodes a peroxisomal catalase, highly expressed in bolts and leaves. mRNA expression patterns show circadian regulation with mRNA levels being high in the subjective early morning. Loss of function mutations have increased H2O2 levels and increased H2O2 sensitivity. Mutants accumu…
Ach_contig15094	L ascorbate oxidase like [Solanum lycopersicum]	gi|2493321|sp|Q40588.1|ASO_TOBAC	-1.4081	0	0	0	0	0	0	ASO	Achn059971		(q40588|aso_tobac : 534.0) L ascorbate oxidase precursor (EC 1.10.3.3) (Ascorbase) (ASO) Nicotiana tabacum (Common tobacco) & (at5g21105 : 458.0) Plant L ascorbate oxidase; FUNCTIONS IN: oxidoreductase activity, L ascorbate oxidase activity, copper ion binding; INVOLVED IN: oxidation reduction; EXPRESSED IN: 23 plant structures; EXPRESSED DURING: 13 growth stages; CONTAINS InterPro DOMAIN/s: Mult…
Ach_contig7182	peroxidase 50 [Tarenaya hassleriana]	gi|26397925|sp|Q9SZE7.1|PER51_ARATH	1.7556	0	0	0	0	0	0	PER51	Achn017271		(at4g37520 : 128.0) Peroxidase superfamily protein; FUNCTIONS IN: protein binding, peroxidase activity; INVOLVED IN: oxidation reduction, response to oxidative stress; LOCATED IN: cytoplasm; CONTAINS InterPro DOMAIN/s: Haem peroxidase (InterPro:IPR010255), Plant peroxidase (InterPro:IPR000823), Peroxidases heam ligand binding site (InterPro:IPR019793), Haem peroxidase, plant/fungal/bacterial (Int…
Ach_contig30858	chloroplast Cu/ZnSOD [Gossypium hirsutum]	gi|3914999|sp|O04997.1|SODCP_SOLCS	0	0	0	0	-1.38817	-1.12862	0	SODCP	Achn017271		(p93407|sodcp_orysa : 255.0) Superoxide dismutase [Cu Zn], chloroplast precursor (EC 1.15.1.1) Oryza sativa (Rice) & (at2g28190 : 247.0) Encodes a chloroplastic copper/zinc superoxide dismutase CSD2 that can detoxify superoxide radicals. Its expression is affected by miR398 directed mRNA cleavage.; copper/zinc superoxide dismutase 2 (CSD2); FUNCTIONS IN: superoxide dismutase activity; INVOLVED IN…
Ach_contig20101	cationic peroxidase 1 [Vitis vinifera]	gi|6093671|sp|P22195.2|PER1_ARAHY	2.6368	0	0	0	0	0	0	PER1	Achn017271	K13447	(p22195|per1_arahy : 344.0) Cationic peroxidase 1 precursor (EC 1.11.1.7) (PNPC1) Arachis hypogaea (Peanut) & (at5g05340 : 326.0) Peroxidase superfamily protein; FUNCTIONS IN: protein binding, peroxidase activity; INVOLVED IN: response to oxidative stress, oxidation reduction; LOCATED IN: apoplast, cell wall; EXPRESSED IN: 9 plant structures; EXPRESSED DURING: LP.04 four leaves visible, 4 anthesi…
Ach_contig10321	Peroxidase superfamily protein [Theobroma cacao]	gi|6093671|sp|P22195.2|PER1_ARAHY	3.54153	0	0	0	0	0	0	PER1	Achn017271	K13447	(p22195|per1_arahy : 385.0) Cationic peroxidase 1 precursor (EC 1.11.1.7) (PNPC1) Arachis hypogaea (Peanut) & (at5g05340 : 338.0) Peroxidase superfamily protein; FUNCTIONS IN: protein binding, peroxidase activity; INVOLVED IN: response to oxidative stress, oxidation reduction; LOCATED IN: apoplast, cell wall; EXPRESSED IN: 9 plant structures; EXPRESSED DURING: LP.04 four leaves visible, 4 anthesi…
Ach_contig35730	Peroxidase superfamily protein [Theobroma cacao]	gi|6093671|sp|P22195.2|PER1_ARAHY	0	0	0	0	1.19758	0	1.01552	PER1	Achn310611		(p22195|per1_arahy : 402.0) Cationic peroxidase 1 precursor (EC 1.11.1.7) (PNPC1) Arachis hypogaea (Peanut) & (at5g05340 : 334.0) Peroxidase superfamily protein; FUNCTIONS IN: protein binding, peroxidase activity; INVOLVED IN: response to oxidative stress, oxidation reduction; LOCATED IN: apoplast, cell wall; EXPRESSED IN: 9 plant structures; EXPRESSED DURING: LP.04 four leaves visible, 4 anthesi…
Ach_contig10320	cationic peroxidase 1 like [Fragaria vesca subsp. vesca]	gi|6093671|sp|P22195.2|PER1_ARAHY	0	0	0	0	0	0	3.04794	PER1	Achn310611		(p22195|per1_arahy : 285.0) Cationic peroxidase 1 precursor (EC 1.11.1.7) (PNPC1) Arachis hypogaea (Peanut) & (at5g05340 : 249.0) Peroxidase superfamily protein; FUNCTIONS IN: protein binding, peroxidase activity; INVOLVED IN: response to oxidative stress, oxidation reduction; LOCATED IN: apoplast, cell wall; EXPRESSED IN: 9 plant structures; EXPRESSED DURING: LP.04 four leaves visible, 4 anthesi…
Ach_contig37977	hypothetical protein PRUPE_ppa000913mg [Prunus persica]	gi|75164735|sp|Q948U0.1|RBOHA_SOLTU	0	0	0	0	0	0	1.05983	RBOHA	Achn214061	K00430	(at1g64060 : 1406.0) Interacts with AtrbohD gene to fine tune the spatial control of ROI production and hypersensitive response to cell in and around infection site.; respiratory burst oxidase protein F (RBOH F); FUNCTIONS IN: NAD(P)H oxidase activity; INVOLVED IN: in 10 processes; LOCATED IN: plasma membrane, integral to plasma membrane; EXPRESSED IN: 22 plant structures; EXPRESSED DURING: 13 gr…
Ach_contig27830	hypersensitive induced response protein [Carica papaya]	gi|75262692|sp|Q9FM19.1|HIR1_ARATH	-1.02813	0	0	0	0	0	0	HIR1	Achn191471	K00430	(at5g62740 : 510.0) HYPERSENSITIVE INDUCED RESPONSE PROTEIN 1 (HIR1); INVOLVED IN: N terminal protein myristoylation; LOCATED IN: plasma membrane, vacuole, membrane; EXPRESSED IN: 25 plant structures; EXPRESSED DURING: 15 growth stages; CONTAINS InterPro DOMAIN/s: Band 7 protein (InterPro:IPR001107); BEST Arabidopsis thaliana protein match is: SPFH/Band 7/PHB domain containing membrane associated…		Hypersensitive-induced response protein 2
Ach_contig24154	hypersensitive induced response protein 1 like [Solanum lycopersicum]	gi|75262692|sp|Q9FM19.1|HIR1_ARATH	0	0	0	0	3.18312	0	0	HIR1	Achn303851	K00430	(at5g62740 : 215.0) HYPERSENSITIVE INDUCED RESPONSE PROTEIN 1 (HIR1); INVOLVED IN: N terminal protein myristoylation; LOCATED IN: plasma membrane, vacuole, membrane; EXPRESSED IN: 25 plant structures; EXPRESSED DURING: 15 growth stages; CONTAINS InterPro DOMAIN/s: Band 7 protein (InterPro:IPR001107); BEST Arabidopsis thaliana protein match is: SPFH/Band 7/PHB domain containing membrane associated…
Ach_contig24153	hypersensitive induced response protein 1 like isoform 1 [Cucumis sativus]	gi|75262692|sp|Q9FM19.1|HIR1_ARATH	0	0	0	5.36545	4.00689	2.4928	2.76229	HIR1	Achn303851	K00430	(at1g69840 : 77.8) SPFH/Band 7/PHB domain containing membrane associated protein family; INVOLVED IN: biological_process unknown; EXPRESSED IN: 24 plant structures; EXPRESSED DURING: 15 growth stages; CONTAINS InterPro DOMAIN/s: Band 7 protein (InterPro:IPR001107); BEST Arabidopsis thaliana protein match is: SPFH/Band 7/PHB domain containing membrane associated protein family (TAIR:AT5G62740.1). …
Ach_contig24151	hypersensitive induced reaction protein 1 [Glycine max]	gi|75271990|sp|Q9CAR7.1|HIR2_ARATH	-1.5692	0	0	0	0	0	0	HIR2	Achn310611		(at1g69840 : 86.3) SPFH/Band 7/PHB domain containing membrane associated protein family; INVOLVED IN: biological_process unknown; EXPRESSED IN: 24 plant structures; EXPRESSED DURING: 15 growth stages; CONTAINS InterPro DOMAIN/s: Band 7 protein (InterPro:IPR001107); BEST Arabidopsis thaliana protein match is: SPFH/Band 7/PHB domain containing membrane associated protein family (TAIR:AT5G62740.1). …
Ach_contig24158	hypersensitive-induced response protein 2 [Solanum tuberosum]	gi|75271990|sp|Q9CAR7.1|HIR2_ARATH	0	0	0	2.24152	2.5354	0	0	HIR2	Achn228031	K00423	(at1g69840 : 366.0) SPFH/Band 7/PHB domain containing membrane associated protein family; INVOLVED IN: biological_process unknown; EXPRESSED IN: 24 plant structures; EXPRESSED DURING: 15 growth stages; CONTAINS InterPro DOMAIN/s: Band 7 protein (InterPro:IPR001107); BEST Arabidopsis thaliana protein match is: SPFH/Band 7/PHB domain containing membrane associated protein family (TAIR:AT5G62740.1).…
Ach_contig24159	predicted protein [Populus trichocarpa]	gi|75271990|sp|Q9CAR7.1|HIR2_ARATH	0	0	0	0	0	0	2.34439	HIR2	Achn117971		(at5g62740 : 373.0) HYPERSENSITIVE INDUCED RESPONSE PROTEIN 1 (HIR1); INVOLVED IN: N terminal protein myristoylation; LOCATED IN: plasma membrane, vacuole, membrane; EXPRESSED IN: 25 plant structures; EXPRESSED DURING: 15 growth stages; CONTAINS InterPro DOMAIN/s: Band 7 protein (InterPro:IPR001107); BEST Arabidopsis thaliana protein match is: SPFH/Band 7/PHB domain containing membrane associated…
Ach_contig24161	hypersensitive-induced response protein 2 [Populus euphratica]	gi|75271990|sp|Q9CAR7.1|HIR2_ARATH	0	0	0	0	4.04063	0	2.96957	HIR2	Achn185871	K04565	(at1g69840 : 240.0) SPFH/Band 7/PHB domain containing membrane associated protein family; INVOLVED IN: biological_process unknown; EXPRESSED IN: 24 plant structures; EXPRESSED DURING: 15 growth stages; CONTAINS InterPro DOMAIN/s: Band 7 protein (InterPro:IPR001107); BEST Arabidopsis thaliana protein match is: SPFH/Band 7/PHB domain containing membrane associated protein family (TAIR:AT5G62740.1).…
Ach_contig7460	short chain alcohol dehydrogenase, putative [Ricinus communis]	gi|75306631|sp|Q94K41.1|SDR3B_ARATH	0	0	0	0	0	0	1.74329	SDR3B	Achn072251	K00430	(at2g47140 : 252.0) NAD(P) binding Rossmann fold superfamily protein; FUNCTIONS IN: oxidoreductase activity, binding, catalytic activity; INVOLVED IN: oxidation reduction, metabolic process; LOCATED IN: cellular_component unknown; EXPRESSED IN: 6 plant structures; EXPRESSED DURING: 4 anthesis, LP.10 ten leaves visible, petal differentiation and expansion stage, LP.08 eight leaves visible, LP.12 t…
Ach_contig12730	ascorbate peroxidase [Camellia sinensis]	gi|75308965|sp|Q9FE01.1|APX2_ORYSJ	-1.22214	0	0	0	0	0	0	APX2	Achn342251	K00430	(q9fe01|apx2_orysa : 375.0) L ascorbate peroxidase 2, cytosolic (EC 1.11.1.11) (APXb) (OsAPx02) Oryza sativa (Rice) & (at1g07890 : 362.0) Encodes a cytosolic ascorbate peroxidase APX1. Ascorbate peroxidases are enzymes that scavenge hydrogen peroxide in plant cells. Eight types of APX have been described for Arabidopsis: three cytosolic (APX1, APX2, APX6), two chloroplastic types (stromal sAPX, t…
Ach_contig3098	short chain alcohol dehydrogenase, putative [Ricinus communis]	gi|75313292|sp|Q9SCU0.1|SDR2A_ARATH	2.16734	0	0	0	0	2.14356	0	SDR2A	Achn175281	K00430	(at3g51680 : 414.0) NAD(P) binding Rossmann fold superfamily protein; FUNCTIONS IN: oxidoreductase activity, binding, catalytic activity; INVOLVED IN: oxidation reduction, metabolic process; LOCATED IN: cellular_component unknown; EXPRESSED IN: cotyledon, root; CONTAINS InterPro DOMAIN/s: NAD(P) binding domain (InterPro:IPR016040), Glucose/ribitol dehydrogenase (InterPro:IPR002347), Short chain d…
Ach_contig20425	Dehydroascorbate reductase 1 isoform 1 [Theobroma cacao]	gi|75330001|sp|Q8LE52.1|DHAR3_ARATH	0	0	0	0	-1.02945	0	0	DHAR3	Achn175281	K00430	(at5g16710 : 353.0) The protein undergoes thiolation following treatment with the oxidant tert butylhydroperoxide.; dehydroascorbate reductase 1 (DHAR3); FUNCTIONS IN: glutathione dehydrogenase (ascorbate) activity; INVOLVED IN: protein amino acid glutathionylation; LOCATED IN: chloroplast stroma, chloroplast, chloroplast envelope; EXPRESSED IN: 23 plant structures; EXPRESSED DURING: 14 growth st…
Ach_contig13127	NADPH:quinone oxidoreductase [Vitis vinifera]		-1.64502	0	0	0	0	0	0	NQR	Achn052291	K13447	(at3g27890 : 298.0) Encodes NAD(P)H:quinone reductase which is an FMN binding protein that catalyzes the reduction of quinone substrates to hydroquinones.The enzyme activity was confirmed by in vitro assay.; NADPH:quinone oxidoreductase (NQR); FUNCTIONS IN: FMN reductase activity; INVOLVED IN: response to salt stress, defense response to bacterium; LOCATED IN: chloroplast stroma, chloroplast, pla…
